# Supplementary material
Source: Research Square preprint supplement (doi:10.21203/rs.3.rs-9358319/v1)
Supplement: Supplementary file 1 [file 09332b00c13368112109bbf2.xlsx]

## Sheet: Table 1A
	Clinical parameter	Category / measuring unit	CP
	Total number	N	33 (100.0%)
	Gender	Male	20 (60.6%)
		Female	13 (39.4%)
	Age at operation	Median (range) in years	56 (16 – 80)
	BMI	Median (iqr) in Kg/m2	23.5 (20.6 – 26.6)
	ASA classification	ASA 1	3 (9.1%)
		ASA 2	16 (48.5%)
		ASA 3	12 (36.4%)
		ASA X	2 (6.1%)
	CA 19-9 preoperative	Median (iqr) in U/mL	18.7 (7.3 – 43.6)
	Diabetes mellitus	no DM	20 (60.6%)
		NIDDM	3 (9.1%)
		IDDM	2 (24.2%)
		Missing data	2 (6.1%)
	Pain intensity	None	2 (6.1%)
		Light	1 (3.0%)
		Medium	7 (21.2%)
		Heavy	18 (54.6%)
		Missing data	5 (15.2%)
	Pain frequency	Never	2 (6.1%)
		Monthly	7 (21.2%)
		Weekly	1 (3.0%)
		Daily	15 (45.5%)
		Missing data	8 (24.2%)
	Episodes of acute pancreatitis	0	1 (3.7%)
		1	9 33.3%)
		2 / 3	5 (18.5%)
		4 / 5	6 (22.2%)
		>5	6 (22.2%)
		Missing data	6
	Type of operation	Pancreatoduodenectomy	21 (63.6%)
		Total pancreatectomy	5 (15.2%)
		Distal pancreatectomy	6 (18.2%)
		DPRHP	1 (3.0%)
	Experimental Procedure
	Immunofluorescence (FFPE)		6 (18,1%)
	Endotoxin Assay (cryo)		31 (93,9%)
	Microbiome Analysis (cryo)		30 (90,9%)
