# Supplementary material
Source: Research Square preprint supplement (doi:10.21203/rs.3.rs-9358319/v1)
Supplement: Supplementary file 2 [file 27f0a4ddfe47c7a94043c0bd.xlsx]

## Sheet: Table 1C
	Clinical parameter	Neoadjuvant	Adjuvant
	Total number	62 (100.0%)	101 (100.0%)
	Gender
	Male	34 (54.8%)	67 (66.3%)
	Female	28 (45.2%)	34 (33.7%)
	Median age (range) in years	62 (39 – 82)	62 (30 – 84)
	Median BMI (iqr) in Kg/m2	24.3 (22.3 – 26.0)	24.9 (23.0 – 26.7)
	ASA classification
	ASA 1	1 (1.6%)	11 (10.9%)
	ASA 2	36 (58.1%)	62 (61.4%)
	ASA 3	23 (37.1%)	26 (25.7%)
	ASA X	2 (3.2%)	2 (2.0%)
	Median CA 19-9 (iqr) in U/mL	42.3 (10.5 – 284.5)	155.1 (24.8 – 683.1)
	Localization of tumor
	Pancreatic head	35 (56.5%)	64 (63.4%)
	Pancreatic body	13 (21.0%)	12 (11.9%)
	Pancreatic tail	4 (6.4%)	12 (11.9%)
	Multifocal disease	10 (16.1%)	9 (8.9%)
	Peripancreatic	0 (0.0%)	4 (4.0%)
	Primary resectabilty status
	resectable	2 (3.2%)	101 (100.0%)
	borderline	7 (11.3%)	0 (0.0%)
	locally advanced	36 (58.1%)	0 (0.0%)
	distant metastasis	17 (27.4%)	0 (0.0%)
	Type of operation
	Pancreatoduodenectomy	24 (38.7%)	58 (57.4%)
	Distal pancreatectomy	14 (22.6%)	24 (23.8%)
	Total pancreatectomy	24 (38.7%)	19 (18.8%)
	Vessel resection
	Arterial resection	16 (25.8%)	3 (3.0%)
	PV/SMV resection	36 (58.1%)	31 (30.7%)
	Tumor size
	T1: 2cm	6 (9.7%)	11 (11.5%)
	T2: 2-≤4cm	27 (43.5%)	58 (60.4%)
	T3: >4cm	23 (37.1%)	25 (26.0%)
	T4: arterial infiltration	6 (9.7%)	2 (2.1%)
	Missing data	0	5
	Positive node count
	N0: 0	22 (35.5%)	23 (22.8%)
	N1: 1-3	18 (29.0%)	36 (35.6%)
	N2: ≥4	22 (35.5%)	42 (41.6%)
	M status
	M0	53 (85.5%)	90 (89.1%)
	M1	9 (14.5%)	11 (10.9%)
	AJCC stage
	IA	5 (8.1%)	5 (5.2%)
	IB	8 (12.9%)	15 (15.6%)
	IIA	4 (6.4%)	2 (2.1%)
	IIB	14 (22.6%)	30 (31.2%)
	III	22 (35.5%)	33 (34.4%)
	IV	9 (14.5%)	11 (11.5%)
	R-classification
	R0	15 (24.2%)	26 (25.7%)
	R1	47 (75.8%)	72 (71.3%)
	Rx	0 (0.0%)	3 (3.0%)
	Chemo-naïve set	0 (0.0%)	101 (100.0%)
	Post-operative chemotherapy
	mFOLFIRINOX		ND
	Gemcitabine		ND
	Combination		ND
	Neoadjuvant set	62 (100.0%)	0 (0.0%)
	Pre-operative chemotherapy
	FOLFIRINOX	39 (62.9%)
	FOLFIRINOX + other	2 (3.2%)
	Gemcitabine/NAB-Paclitaxel	7 (11.3%)
	Gemcitabine mono	7 (11.3%)
	Gemcitabine combination	6 (9.7)
	Missing data	1 (1.6%)
	Experimental Procedure
	Immunofluorescence/FISH (FFPE)	48 (77.4%)	64 (63,3%)
	Endotoxin Assay (cryo)	15 (24.1%)	35 (34.6%)
	Microbiome Analysis (cryo)	13 (20.9%)	26 (25.7%)
