# Supplementary material
Source: Research Square preprint supplement (doi:10.21203/rs.3.rs-9358319/v1)
Supplement: Supplementary file 3 [file b475b5073fd622a1b27009d9.xlsx]

## Sheet: Antibodies
	The list of primary antibodies for IF
	Primary Antibodies	Catalog No.	Dilution Ratio	Source
	LAMP2	PA1-655 (ThermoFisher)	direct labbeled Alexa 647	Rabbit
	LC3B	NB600-1384 (Biotechne)	direct labbeled Alexa 555	Rabbit
	LPS	ab35654 (Abcam)	anti-Mouse Alexa 488	Mouse
	TLR4	ab13556	anti-Rabbit Alexa 555	Rabbit
	αAmylase	Santa Cruz Biot. sc-46657	anti-Mouse Alexa 647	Mouse
	Cytokeratin-19	Abcam ab52625	anti-Rabbit Alexa 555	Rabbit
	The list of primary antibodies for WB
	Antibodies	Catalog No.	Dilution Ratio	Molecular Wt.	Source
	ATG5	Abgent AP-1812A	1/1000	32 kDa	Rabbit
	BECLIN1	Santa Cruz Biot. sc-48381	1/200	60 kDa	Mouse
	LAMP2	Sigma-Aldrich L0668	1/1000	110 kDa	Rabbit
	LC3B	Cell Signaling cs2775s	1/1000	14/16 kDa	Rabbit
	SQSTM1, p62	Cell Signaling cs5114	1/1000	62 kDa	Rabbit
	LPS	Abcam ab-35654	1/100	50 kDa	Mouse
	GAPDH	Cell Signaling cs-2118	1/1000	37 kDa	Rabbit

## Sheet: Primer
	Gene	Primer Sequence	Reference
	16S rRNA	Forward: 5´-AGAGTTTGATCMTGGCTCAG-3	(Yang, Chen et al., 2015)
		Reverse: 5``-TGCTGCCTCCCGTAGGAGT-3’
