# Supplementary material
Source: Research Square preprint supplement (doi:10.21203/rs.3.rs-9358319/v1)
Supplement: Supplementary file 4 [file c54f79ca628ce0dbd2f8f06e.xlsx]

## Sheet: Table 1B
	Clinical parameter	Category / measuring unit	IPMN
	Total number	N	24 (100.0%)
	Gender	Male	12 (50.0%)
		Female	12 (50.0%)
	Age at operation	Median (range) in years	62 (31 – 83)
	BMI	Median (iqr) in Kg/m2	23.6 (22.5 – 28.8)
	ASA classification	ASA 1	2 (8.3%)
		ASA 2	13 (54.2%)
		ASA 3	7 (29.2%)
		ASA 4	1 (4.2%)
		ASA X	1 (4.2%)
	CA 19-9 preoperative	Median (iqr) in U/mL	9.4 (7.8 – 13.8)
	Type of IPMN	Main duct	2 (8.7%)
		Mixed type	14 (60.9%)
		Branch duct	7 (30.4%)
		Missing data	1
	Degree of dysplasia	Adenoma	14 (58.3%)
		Borderline	1 (4.2%)
		Carcinoma in situ	8 (33.3%)
		Invasive carcinoma	1 (4.2%)
	Localization of lesion	Pancreatic head	9 (37.5%)
		Pancreatic body	0 (0.0%)
		Pancreatic tail	7 (29.2%)
		Multifocal disease	8 (33.3%)
	Type of operation	Pancreatoduodenectomy	8 (33.3%)
		Total pancreatectomy	8 (33.3%)
		Distal pancreatectomy	7 (29.2%)
		Enucleation	1 (4.2%)
	Vessel resection	N	0 (0.0%)
	Experimental Procedure
	Immunofluorescence (FFPE)		4 (16,6%)
	Endotoxin Assay (cryo)		24 (100%)
	Microbiome Analysis (cryo)		21 (87,4%)
